# Supplementary material for: Global distribution of particle phase state in atmospheric secondary organic aerosols
Source: PubMed Central journal article supplement (PMC5413943; doi:10.1038/ncomms15002), 2017-04-21
Supplement: ncomms15002-s1.pdf [file ncomms15002-s1.pdf]

1 **Supplementary Table 1.** Molar mass ( $M$ ), O:C and  $T_g$  for SOA products in volatility  
 2 bins.

| Volatility<br>( $\mu\text{g m}^{-3}$ ) | Anthropogenic SOA           |      |           | Biogenic SOA                |      |           |
|----------------------------------------|-----------------------------|------|-----------|-----------------------------|------|-----------|
|                                        | $M$ ( $\text{g mol}^{-1}$ ) | O:C  | $T_g$ (K) | $M$ ( $\text{g mol}^{-1}$ ) | O:C  | $T_g$ (K) |
| 1                                      | 362                         | 0.6  | 326       | 293                         | 0.4  | 298       |
| 10                                     | 249                         | 0.4  | 276       | 203                         | 0.24 | 234       |
| 100                                    | 227                         | 0.3  | 256       | 185                         | 0.14 | 211       |
| 1000                                   | 205                         | 0.25 | 236       | 167                         | 0.1  | 192       |

3  
 4

5 **Supplementary Table 2.** Molar mass distributions for sensitivity studies of  $T_g$   
 6 prediction.

| Volatility<br>( $\mu\text{g m}^{-3}$ ) | Anthropogenic SOA |          | Biogenic SOA |          |
|----------------------------------------|-------------------|----------|--------------|----------|
|                                        | High case         | Low case | High case    | Low case |
| 1                                      | 434               | 290      | 352          | 234      |
| 10                                     | 299               | 199      | 244          | 162      |
| 100                                    | 272               | 182      | 222          | 148      |
| 1000                                   | 246               | 164      | 200          | 134      |

7

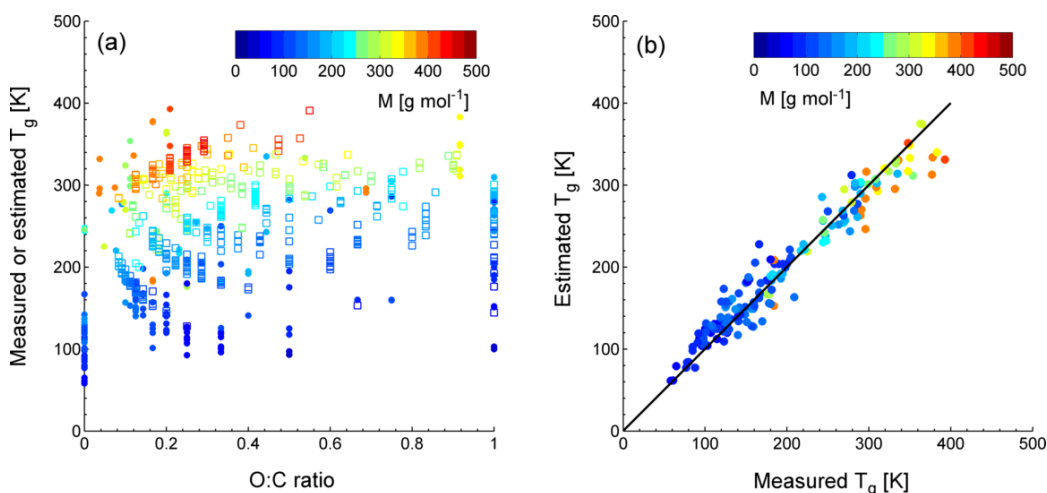

8  
 9 **Supplementary Figure 1. Characteristic relations between molecular O:C ratio**  
 10 **and glass transition temperature of organic compounds.** (a) Measured (circles)  
 11 and estimated (squares) glass transition temperature ( $T_g$ ) of organic compounds as a  
 12 function of O:C ratio. Organic compounds with measured  $T_g$  are from Koop et al.  
 13 (2011)<sup>1</sup> and Dette et al. (2014)<sup>2</sup>. Those with estimated  $T_g$  are 654 SOA components  
 14 from Shiraiwa et al. (2014)<sup>3</sup>. (b) Comparison of measured and estimated  $T_g$  for 179  
 15 organic compounds<sup>1,2</sup>. The markers are color-coded by molar mass. The correlation  
 16 coefficient is 0.97, demonstrating that the estimation method of  $T_g$  using EPI and the  
 17 Boyer-Kauzmann rule is adequate.

18

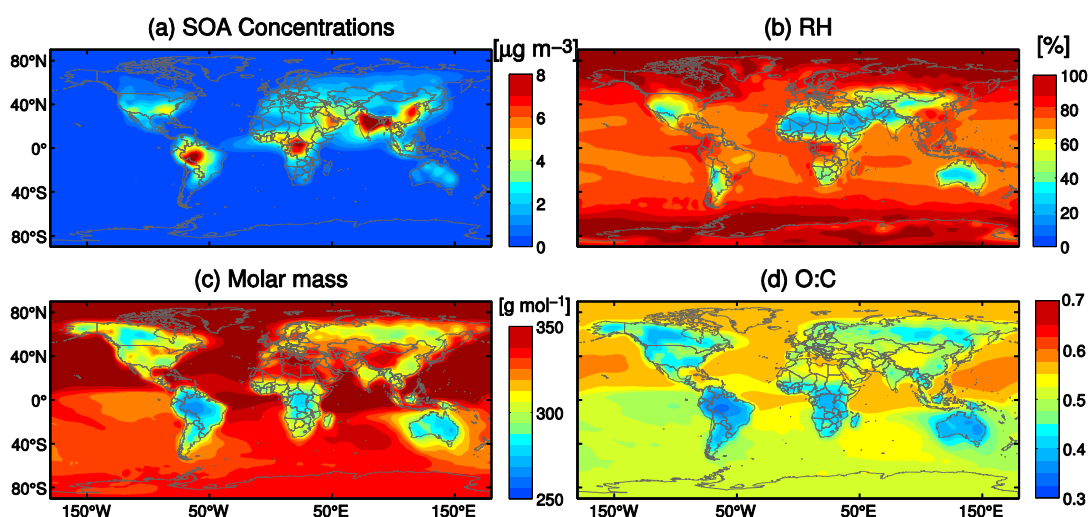

19  
 20 **Supplementary Figure 2. Global modeling of SOA.** Modeled annual averages of (a)  
 21 SOA concentrations, (b) relative humidity, (c) molar mass and (d) O:C at the surface  
 22 during the years 2005-2009.

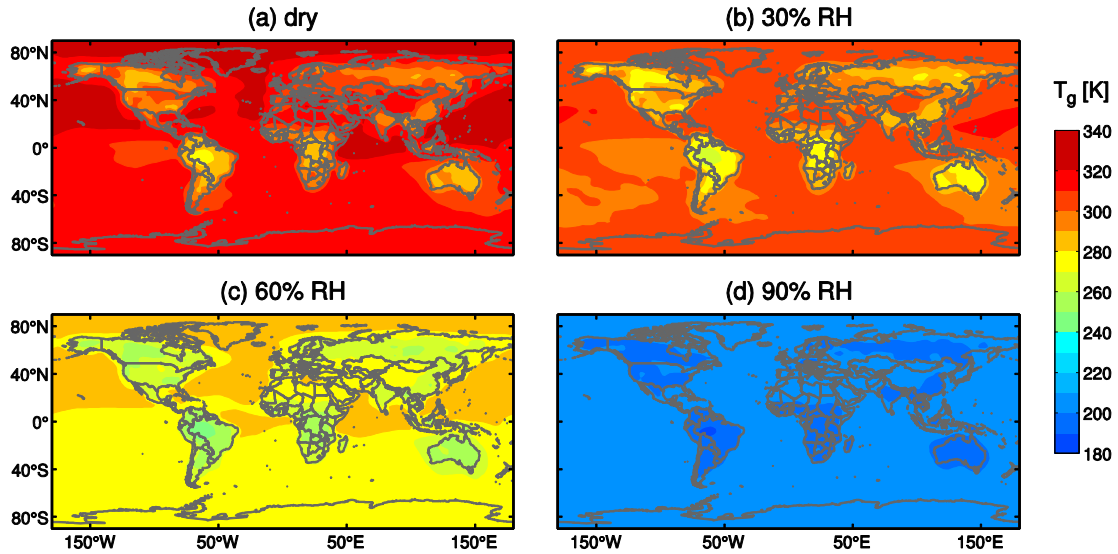

23

24 **Supplementary Figure 3. Modeled annual averages of  $T_g$  of SOA particles.** (a)

25 Dry condition, (b) 30% RH, (c) 60% RH, and (d) 90% RH at the surface during the

26 years 2005-2009.

27

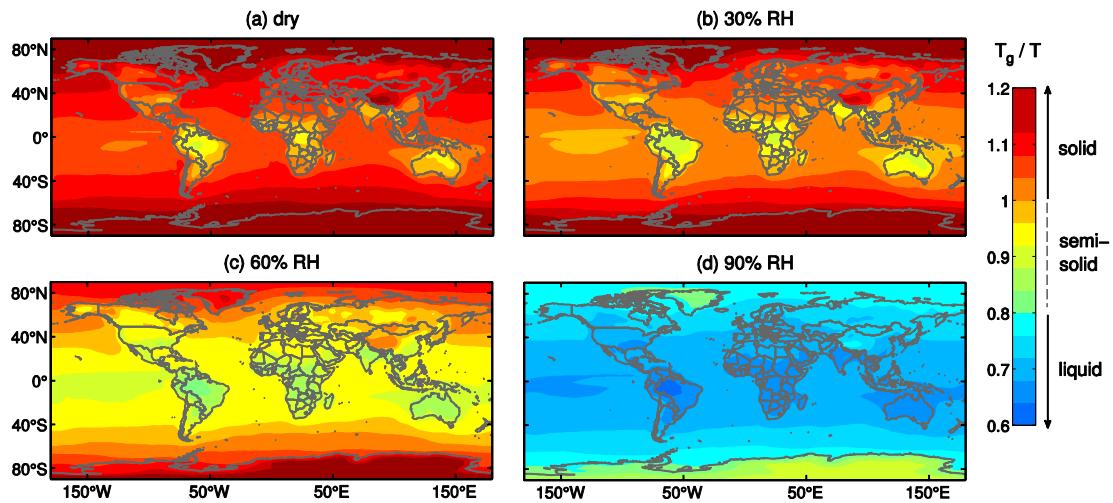

28

29 **Supplementary Figure 4. Modeled annual averages of the inverse ambient**

30 **temperature ( $1/T$ ) scaled by the glass transition temperature ( $T_g$ ) of SOA ( $T_g/T$ ).**

31 (a) Dry condition, (b) 30% RH, (c) 60% RH, and (d) 90% RH at the surface during

32 the years 2005-2009.

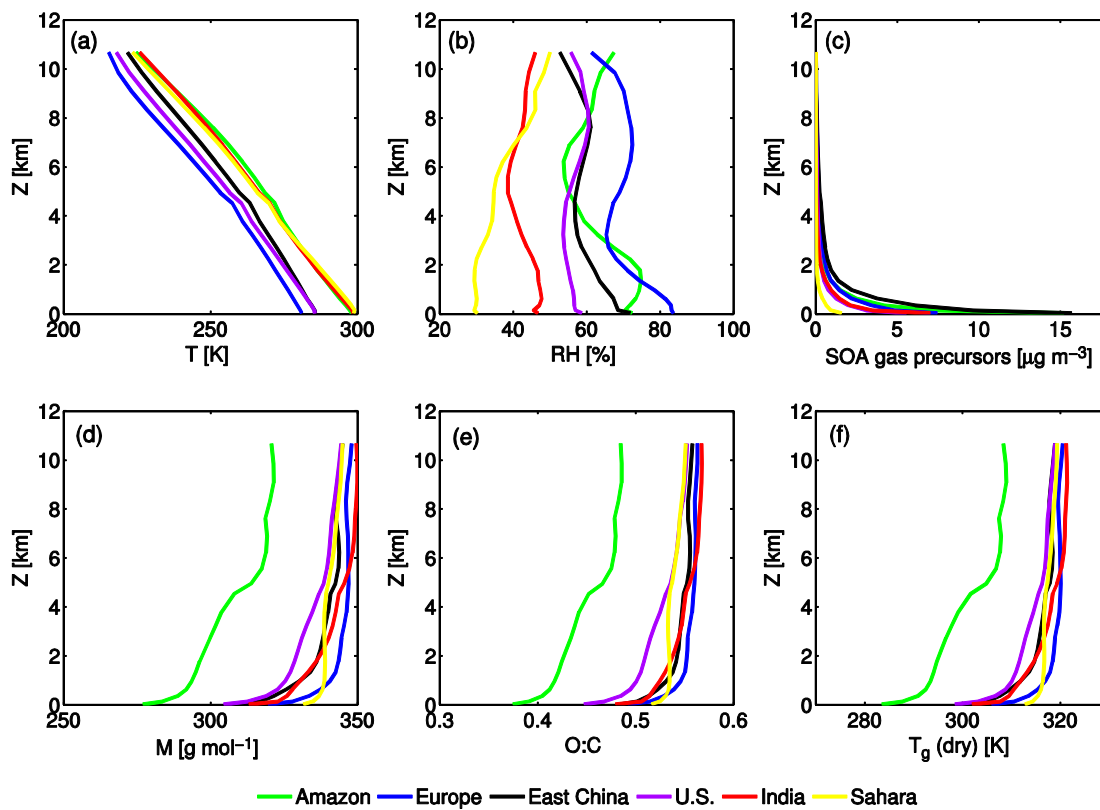

33

34

35 **Supplementary Figure 5. Modeled mean vertical profiles.** (a) ambient temperature,  
 36 (b) relative humidity, (c) concentrations of SOA gas precursors, (d) molar mass, (e)  
 37 O:C, and (f)  $T_g$  of dry SOA. The simulation grids covered by the Amazon basin,  
 38 Europe, East China, U.S., India and Sahara are shown in Fig. 2(a).

39

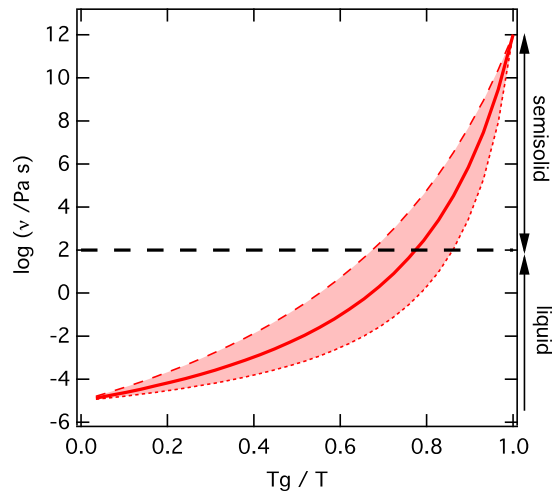

40

41 **Supplementary Figure 6. The Angell plot of viscosity vs.  $T_g / T$ .** The lines represent  
 42 different fragility ( $D$ ) of  $D = 10$  (the solid line) as the base case for this study as well  
 43 as  $D = 5$  (the dotted line) and  $D = 20$  (the dashed line) representing the possible range  
 44 for SOA. The black dashed line at viscosity of  $10^2$  Pa s indicates the threshold of  
 45 liquid and semisolid states.

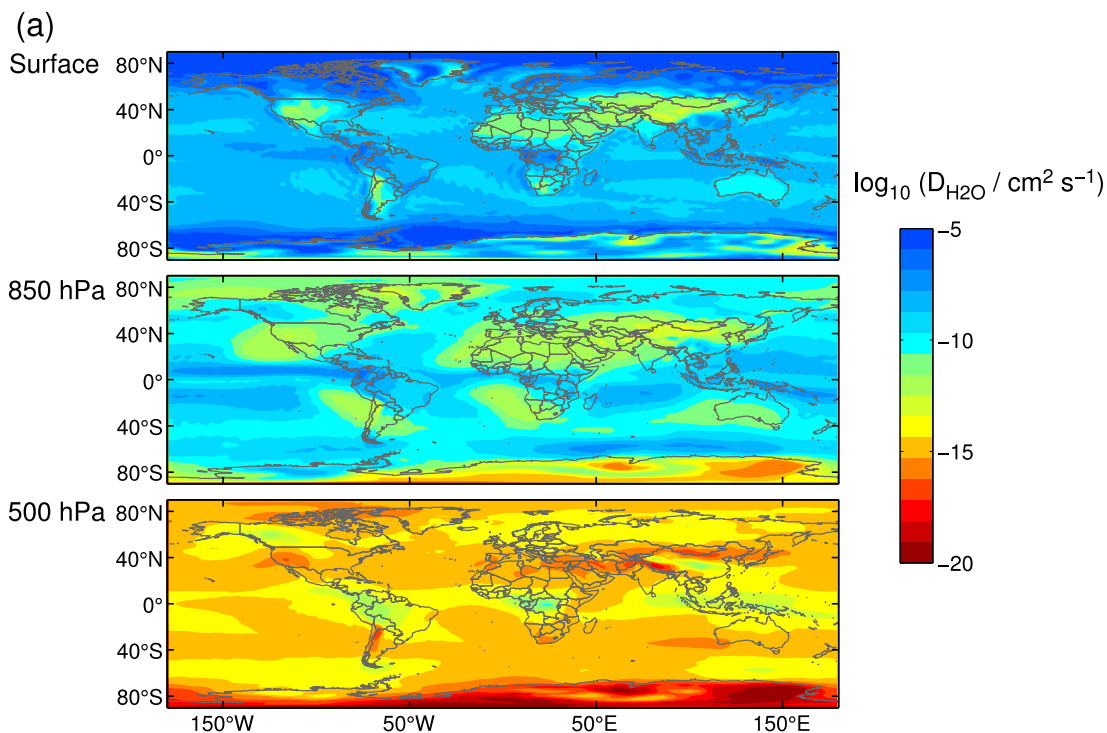

46

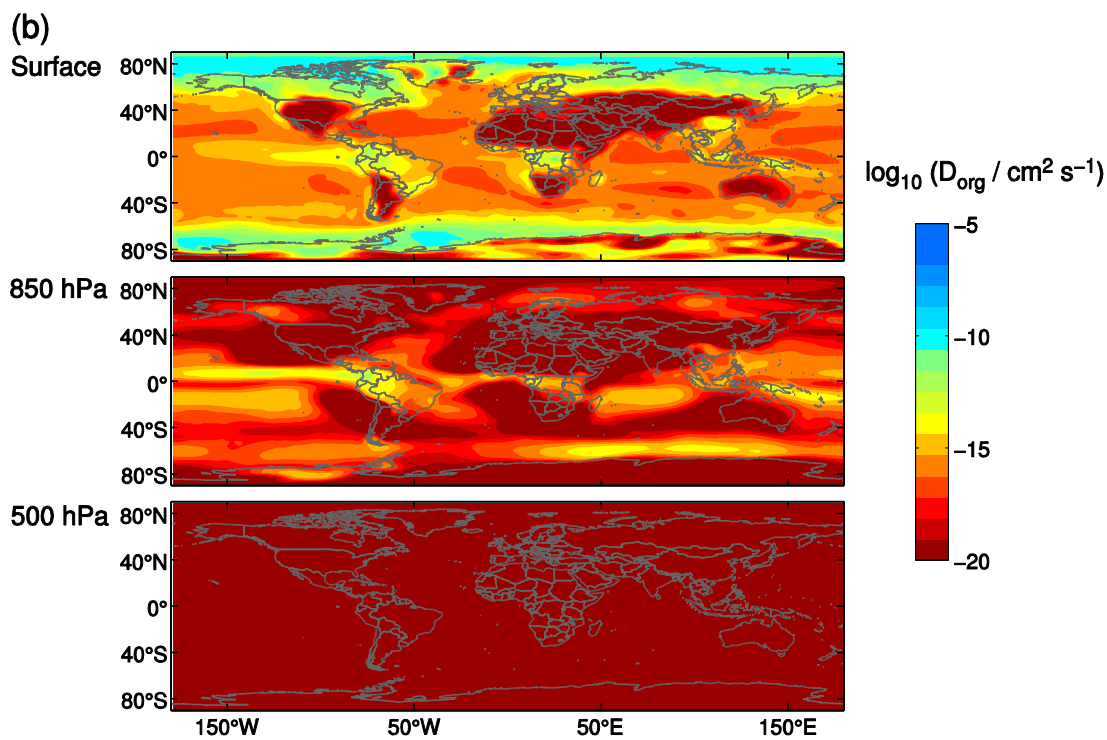

47

48 **Supplementary Figure 7. Global maps of estimated bulk diffusivities. Bulk**  
 49 **diffusivities ( $\text{cm}^2 \text{s}^{-1}$ ) of (a) water and (b) organic molecules in SOA particles at the**  
 50 **surface, 850 hPa, and 500 hPa.**

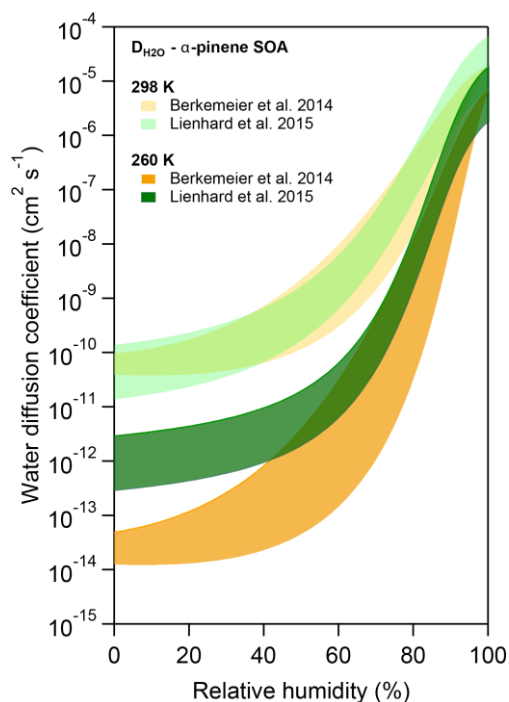

51

52 **Supplementary Figure 8. Water diffusivity in α-pinene SOA.** Comparison of water  
 53 diffusion coefficients in α-pinene SOA (O:C ratio = 0.54) obtained from water uptake  
 54 experiments in an electrodynamic balance<sup>4</sup> (green shaded areas) with values obtained  
 55 with the semi-empirical estimation method presented in Berkemeier et al. (2014)<sup>5</sup>  
 56 (orange shaded areas) at 260 K and 298 K. Water diffusivities were calculated with  
 57 O:C = 0.5,  $T_{g,SOA} = 278.5 \pm 7$  K,  $\kappa_{org} = 0.12 \pm 0.02$ ,  $k_{GT} = 1.5 \pm 1$ ,  $\rho_{org} = 1.4$  g cm<sup>-3</sup>.

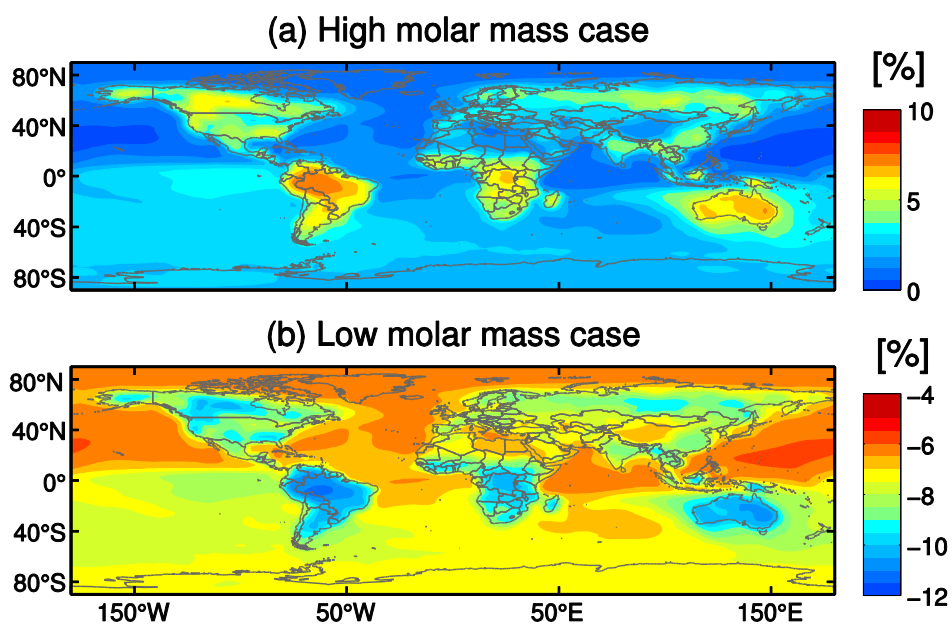

58

59 **Supplementary Figure 9. Sensitivity of molar mass on  $T_g$ .** Modeled annual mean  
 60 differences of  $T_g$  for SOA (without water) between a base case (Table 1) and cases  
 61 with (a) high and (b) low molar mass values assigned in volatility bins  
 62 ([Supplementary Table 2](#)), respectively.

63

64



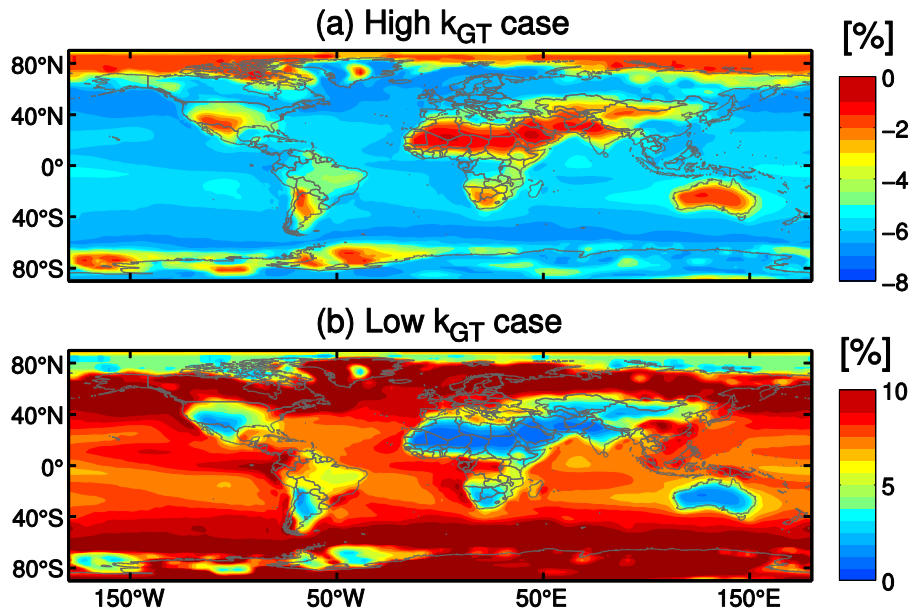

65

66 **Supplementary Figure 10. Sensitivity of  $k_{GT}$  on  $T_g$ .** Modeled annual mean  
 67 differences of  $T_g$  for SOA between a base case with the Gordon-Taylor constant of  
 68  $k_{GT}$  equaling to 2.5 and cases with (a) a higher  $k_{GT}$  of 3.5 and (b) a lower  $k_{GT}$  of 1.5,  
 69 respectively.

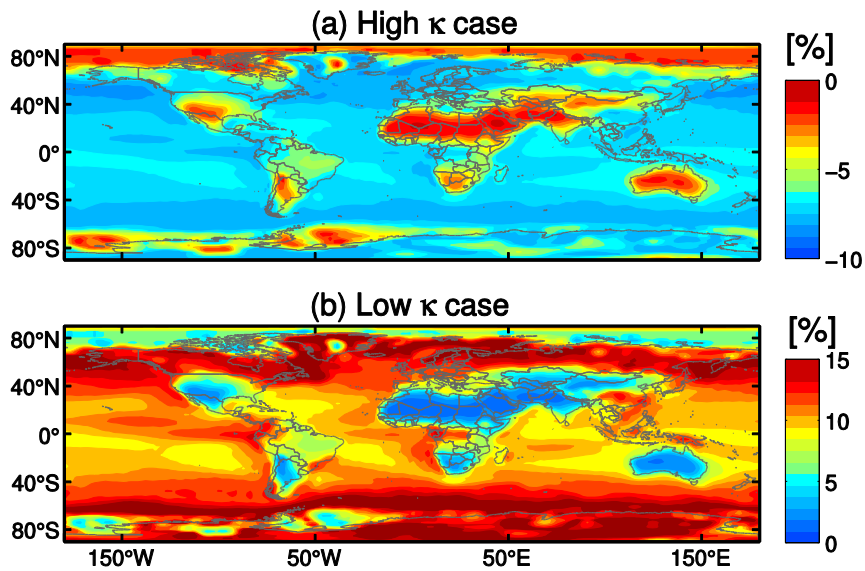

70

71 **Supplementary Figure 11. Sensitivity of  $\kappa$  on  $T_g$ .** Modeled annual mean differences  
 72 of  $T_g$  for SOA between a base case with the hygroscopicity parameter of  $\kappa$  equaling to  
 73 0.1 and cases with (a) a higher  $\kappa$  of 0.15 and (b) a lower  $\kappa$  of 0.05, respectively.

74

75 **Supplementary references.**

- 76 1 Koop, T., Bookhold, J., Shiraiwa, M. & Pöschl, U. Glass transition and phase state of organic  
77 compounds: dependency on molecular properties and implications for secondary organic  
78 aerosols in the atmosphere. *Phys. Chem. Chem. Phys.* **13**, 19238-19255 (2011).
- 79 2 Dette, H. P., Qi, M., Schröder, D. C., Godt, A. & Koop, T. Glass-forming properties of  
80 3-Methylbutane-1,2,3-tricarboxylic acid and its mixtures with water and pinonic acid. *J. Phys.*  
81 *Chem. A* **118**, 7024-7033 (2014).
- 82 3 Shiraiwa, M., Berkemeier, T., Schilling-Fahnestock, K. A., Seinfeld, J. H. & Pöschl, U. Molecular  
83 corridors and kinetic regimes in the multiphase chemical evolution of secondary organic  
84 aerosol. *Atmos. Chem. Phys.* **14**, 8323-8341 (2014).
- 85 4 Lienhard, D. M. *et al.* Viscous organic aerosol particles in the upper troposphere:  
86 diffusivity-controlled water uptake and ice nucleation? *Atmos. Chem. Phys.* **15**, 13599-13613  
87 (2015).
- 88 5 Berkemeier, T., Shiraiwa, M., Pöschl, U. & Koop, T. Competition between water uptake and  
89 ice nucleation by glassy organic aerosol particles. *Atmos. Chem. Phys.* **14**, 12513-12531  
90 (2014).

91
